# Supplementary material
Source: PubMed Central journal article supplement (PMC6707361)
Supplement: NIHMS1042944-supplement-1.pdf [file NIHMS1042944-supplement-1.pdf]

*Epidemiology and Infection*

Title: Epidemiology and Genotypic Characterization of Dissemination Patterns of Uropathogenic *Escherichia coli* in a Community

Authors: M. Matsukawa, M. Igarashi, H. Watanabe, L. Qin, M. Ohnishi, J. Terajima, S. Iyoda, T. Morita-Ishihara, K. Tateda, Y. Ishii, T. Saga, K. Aoki, and R. A.

Bonomo

The supplementary material table of contents:

Table S1. Age and Antimicrobial Resistance of *E. coli* isolates According to Sequence Types and Closely Related Groups. (pages 2 - 3)

Table S2. Chi-squared goodness of fit test for actual and theoretical frequencies of the isolates per week according to Poisson distribution. (pages 4 - 5)

Table S1. Age and Antimicrobial Resistance of *E. coli* isolates According to Sequence Types and Closely Related Groups.

| Classification<br>(no. of strains) | Age, median<br>(range) <sup>a</sup> | Drug<br>resistance %<br>(no. of strains) <sup>b,c</sup> | Tested drugs <sup>d</sup> |          |          |           |          |    |    |          |     |          |         |          |           |          |
|------------------------------------|-------------------------------------|---------------------------------------------------------|---------------------------|----------|----------|-----------|----------|----|----|----------|-----|----------|---------|----------|-----------|----------|
|                                    |                                     |                                                         | PCs                       | C1       | C2       | C3        | C4       | OC | CM | Mon      | CaP | AGs      | TCs     | ST       | FQs       | FOM      |
| All STs (166)                      | 64 (16-90)                          | 22.3 (37)                                               | 15.7 (26)                 | 3.0 (5)  | 2.4 (4)  | 10.2 (17) | 1.2 (2)  | 0  | 0  | 2.4 (4)  | 0   | 4.8 (8)  | 1.8 (3) | 5.4 (9)  | 7.8 (13)  | 0.6 (1)  |
| non HIF STs (66)                   | 68.5 (16-90)                        | 27.3 (18)                                               | 16.7 (11)                 | 0        | 1.5 (1)  | 10.6 (7)  | 0        | 0  | 0  | 1.5 (1)  | 0   | 6.1 (4)  | 4.6 (3) | 4.6 (3)  | 3.0 (2)   | 0        |
| SIF STs (37)                       | 70 (16-90)                          | 24.3 (9)                                                | 13.5 (5)                  | 0        | 2.7 (1)  | 10.8 (4)  | 0        | 0  | 0  | 0        | 0   | 5.4 (2)  | 5.4 (2) | 3.1 (3)  | 2.7 (1)   | 0        |
| MIF STs (29)                       | 64 (16-90)                          | 31.0 (9)                                                | 20.7 (6)                  | 0        | 0        | 10.3 (3)  | 0        | 0  | 0  | 3.5 (1)  | 0   | 6.9 (2)  | 3.5 (1) | 0        | 3.5 (1)   | 0        |
| ST3510, CRG A (2)                  | 46 (22-70)                          | 0                                                       | 0                         | 0        | 0        | 0         | 0        | 0  | 0  | 0        | 0   | 0        | 0       | 0        | 0         | 0        |
| HIF STs (100)                      | 62 (17-90)                          | 19.0 (19)                                               | 15.0 (15)                 | 5.0 (5)  | 3.0 (3)  | 10.0 (10) | 2.0 (2)  | 0  | 0  | 3.0 (3)  | 0   | 4.0 (4)  | 0       | 6.0 (6)  | 11.0 (11) | 1.0 (1)  |
| ST95 (48)                          | 58.5 (17-90)                        | 9.3 (4)                                                 | 6.33 (3)                  | 0        | 0        | 2.1 (1)   | 0        | 0  | 0  | 0        | 0   | 0        | 0       | 4.2 (2)  | 2.1 (1)   | 0        |
| CRG H (12)                         | 56 (20-90)                          | 8.3 (1)                                                 | 0                         | 0        | 0        | 0         | 0        | 0  | 0  | 0        | 0   | 0        | 0       | 8.3 (1)  | 8.3 (1)   | 0        |
| CRG D (5)                          | 55 (46-74)                          | 0                                                       | 0                         | 0        | 0        | 0         | 0        | 0  | 0  | 0        | 0   | 0        | 0       | 0        | 0         | 0        |
| CRG E (3)                          | 68 (64-77)                          | 0                                                       | 0                         | 0        | 0        | 0         | 0        | 0  | 0  | 0        | 0   | 0        | 0       | 0        | 0         | 0        |
| CRG F (3)                          | 18 (17-59)                          | 33.3 (1)                                                | 33.3 (1)                  | 0        | 0        | 0         | 0        | 0  | 0  | 0        | 0   | 0        | 0       | 0        | 0         | 0        |
| CRG G (3)                          | 61 (47-84)                          | 0                                                       | 0                         | 0        | 0        | 0         | 0        | 0  | 0  | 0        | 0   | 0        | 0       | 0        | 0         | 0        |
| CRG C (2)                          | 27 (23-31)                          | 0                                                       | 0                         | 0        | 0        | 0         | 0        | 0  | 0  | 0        | 0   | 0        | 0       | 0        | 0         | 0        |
| CRG I (2)                          | 68.5 (64-73)                        | 0                                                       | 0                         | 0        | 0        | 0         | 0        | 0  | 0  | 0        | 0   | 0        | 0       | 0        | 0         | 0        |
| ST131 (20)                         | 67 (20-85)                          | 65.0 (13)                                               | 55.0 (11)                 | 20.0 (4) | 15.0 (3) | 40.0 (8)  | 10.0 (2) | 0  | 0  | 10.0 (2) | 0   | 20.0 (4) | 0       | 20.0 (4) | 50.0 (10) | 5.0 (1)  |
| CRG B (3)                          | 75 (70-82)                          | 100.0 (3)                                               | 33.3 (1)                  | 0        | 0        | 0         | 0        | 0  | 0  | 0        | 0   | 0        | 0       | 33.3 (1) | 100 (3)   | 33.3 (1) |
| ST73 (17)                          | 67 (34-84)                          | 0                                                       | 0                         | 0        | 0        | 0         | 0        | 0  | 0  | 0        | 0   | 0        | 0       | 0        | 0         | 0        |
| CRG J (4)                          | 62.5 (45-84)                        | 0                                                       | 0                         | 0        | 0        | 0         | 0        | 0  | 0  | 0        | 0   | 0        | 0       | 0        | 0         | 0        |
| CRG K (30)                         | 66 (62-67)                          | 0                                                       | 0                         | 0        | 0        | 0         | 0        | 0  | 0  | 0        | 0   | 0        | 0       | 0        | 0         | 0        |
| ST357 (15)                         | 71 (30-84)                          | 13.3 (2)                                                | 6.7 (1)                   | 6.7 (1)  | 0        | 6.7 (1)   | 0        | 0  | 0  | 1 (6.7)  | 0   | 0        | 0       | 0        | 0         | 0        |

Antimicrobial susceptibility of *E. coli* isolates was determined by the Microscan system using NBP3J, which included the following classes of antibacterial agents (the tested drugs within each): PCs, amino- and acylamino-penicillins (ampicillin, piperacillin); C1, 1st generation cephalosporins (cefazolin); C2, 2nd generation cephalosporins (cefotiam, cefaclor); C3, 3rd generation cephalosporins (cefotaxime, ceftazidime, cefoperazone, cefpodoxime); C4, 4th generation cephalosporins (cefepime, cefpirome, ceftazidime); OC, oxacephems (latamoxef, flomoxef); CM, cephamycins (cefmetazole); Mon, monobactams (aztreonam); CaP, carbapenems (imipenem, meropenem); AGs, aminoglycosides (gentamicin, tobramycin, amikacin, isepamicin); TCs, tetracyclines (minocycline); STs, folate path inhibitor (trimethoprim-sulfamethoxazole); FQs, fluoroquinolones (levofloxacin, ciprofloxacin); FOM, fosfomicin (fosfomicin). HIF indicates high-isolation-frequency; MIF, middle-isolation-frequency; SIF, single-isolation-frequency; CRG, closely related group. <sup>a</sup> For the comparison between Non-HIF STs and ST95;  $p = 0.0135$ , Wilcoxon's signed-ranks test. <sup>b</sup> Strains that defined resistant to any of tested drugs were regarded as to have drug resistance. <sup>c</sup> The drug resistant rate of ST95 and ST73 (ST131) are significantly low (high) compared to that of Non-HIF STs,  $p = 0.0153$  and  $0.0094$  ( $0.0033$ ), respectively.

Table S2. Chi-squared goodness of fit test for actual and theoretical frequencies of the isolates per week according to Poisson distribution.

| Classification<br>(No. of strains) | mean frequency<br>per week | No. of isolates | Actual frequency | Probability for Poisson<br>Distribution* | Theoretical frequency | Value of Chi<br>square | Probability |
|------------------------------------|----------------------------|-----------------|------------------|------------------------------------------|-----------------------|------------------------|-------------|
| All (166)                          | 3.132                      | 0               | 1                | 0.0436                                   | 2.312                 | 6.124                  | 0.523       |
|                                    |                            | 1               | 5                | 0.1367                                   | 7.242                 |                        |             |
|                                    |                            | 2               | 17               | 0.2140                                   | 11.342                |                        |             |
|                                    |                            | 3               | 12               | 0.2234                                   | 11.841                |                        |             |
|                                    |                            | 4               | 6                | 0.1749                                   | 9.271                 |                        |             |
|                                    |                            | 5               | 8                | 0.1096                                   | 5.808                 |                        |             |
|                                    |                            | 6               | 2                | 0.0572                                   | 3.032                 |                        |             |
|                                    |                            | 7               | 1                | 0.0256                                   | 1.356                 |                        |             |
|                                    |                            | 8               | 1                | 0.0100                                   | 0.531                 |                        |             |
|                                    |                            | 9               | 0                | 0.0035                                   | 0.185                 |                        |             |
| HIF (100)                          | 1.887                      | 10              | 0                | 0.0011                                   | 0.058                 | 5.403                  | 0.369       |
|                                    |                            | 0               | 10               | 0.1515                                   | 8.031                 |                        |             |
|                                    |                            | 1               | 11               | 0.2859                                   | 15.154                |                        |             |
|                                    |                            | 2               | 15               | 0.2698                                   | 14.298                |                        |             |
|                                    |                            | 3               | 13               | 0.1697                                   | 8.993                 |                        |             |
|                                    |                            | 4               | 1                | 0.0801                                   | 4.243                 |                        |             |
|                                    |                            | 5               | 2                | 0.0302                                   | 1.601                 |                        |             |
| MIF (29)                           | 0.547                      | 6               | 1                | 0.0095                                   | 0.504                 | 0.452                  | 0.798       |
|                                    |                            | 0               | 30               | 0.5787                                   | 30.670                |                        |             |
|                                    |                            | 1               | 17               | 0.3165                                   | 16.777                |                        |             |
|                                    |                            | 2               | 6                | 0.0866                                   | 4.588                 |                        |             |

|            |       |   |    |        |        |       |       |
|------------|-------|---|----|--------|--------|-------|-------|
|            |       | 0 | 25 | 0.4976 | 26.372 |       |       |
| SIF (37)   | 0.698 | 1 | 21 | 0.3473 | 18.407 | 0.923 | 0.820 |
|            |       | 2 | 5  | 0.1212 | 6.424  |       |       |
|            |       | 3 | 2  | 0.0282 | 1.495  |       |       |
|            |       | 0 | 22 | 0.4041 | 21.419 |       |       |
| ST95 (48)  | 0.906 | 1 | 17 | 0.3661 | 19.406 | 1.694 | 0.638 |
|            |       | 2 | 11 | 0.1659 | 8.791  |       |       |
|            |       | 3 | 3  | 0.0501 | 2.655  |       |       |
|            |       | 0 | 38 | 0.6859 | 36.354 |       |       |
| ST131 (20) | 0.377 | 1 | 11 | 0.2586 | 13.705 | 2.081 | 0.556 |
|            |       | 2 | 3  | 0.0487 | 2.583  |       |       |
|            |       | 3 | 1  | 0.0061 | 0.325  |       |       |
|            |       | 0 | 40 | 0.7261 | 38.486 |       |       |
| ST73 (17)  | 0.32  | 1 | 10 | 0.2324 | 12.315 | 3.463 | 0.326 |
|            |       | 2 | 2  | 0.0372 | 1.970  |       |       |
|            |       | 3 | 1  | 0.0040 | 0.210  |       |       |
|            |       | 0 | 40 | 0.7535 | 39.937 |       |       |
| ST357 (15) | 0.283 | 1 | 11 | 0.2132 | 11.302 | 0.109 | 0.947 |
|            |       | 2 | 2  | 0.0302 | 1.599  |       |       |

\*, probabilities for each value of the variables were calculated using the Poisson formula of  $e^{-\mu}\mu^r/r!$ , where  $\mu$  is the mean of frequencies and  $r$  is the number of events. HIF indicates high-isolation-frequency; MIF, middle-isolation-frequency; SIF, single-isolation-frequency.
